# Supplementary material for: The small non-coding RNA profile of mouse oocytes is modified during aging
Source: Aging (Albany NY). 2019 May 24;11(10):2968–97. doi: 10.18632/aging.101947 (PMC6555462; doi:10.18632/aging.101947)
Supplement: Supplementary Table 6 [file aging-11-101947-s007.pdf]

Supplementary Figures

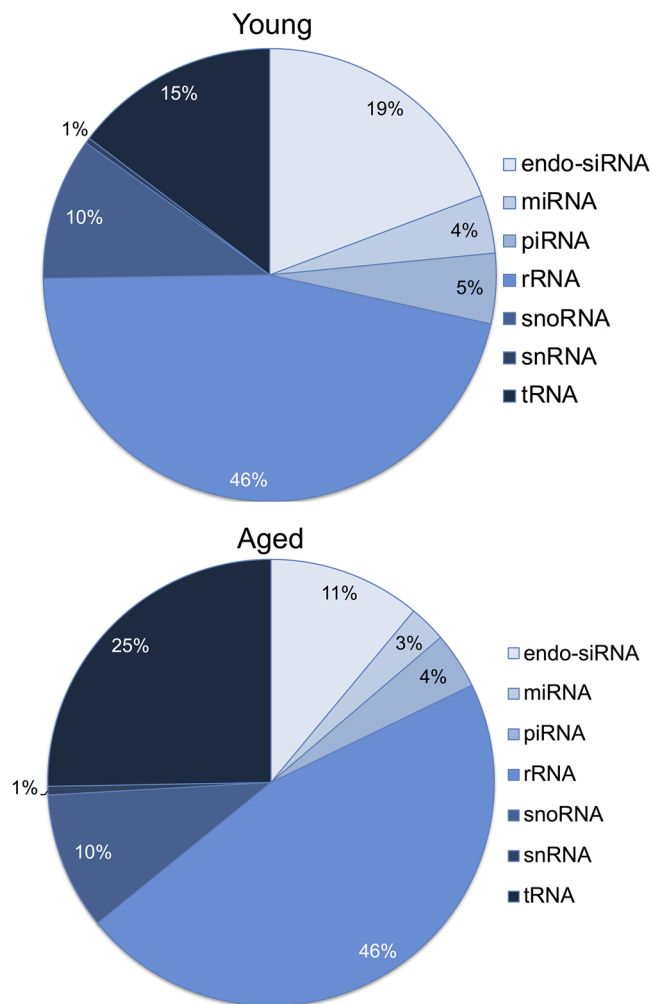

**Supplementary Figure S1. The small RNA signatures of young and aged oocytes.** Following filtering and normalisation, sncRNA reads were mapped to known and miRNA, endo-siRNA, piRNA, rRNA, snoRNA, snRNA, and tRNA fragments from RNAcentral. Pie chart was generated to illustrate the number of total sequences aligning to each small RNA category.

5' UTR

|        |                                                                      |      |
|--------|----------------------------------------------------------------------|------|
| KIFC1  | -----ATTCAAAAGTGGCGGGTGTGGCTGATTGGCCT                                | 32   |
| KIFC5B | GAAGTGCCTTGACTGCGCGGAGGTTGAAATTCAAAAGTGAAGTGTGGCGGATTGGCCT           | 60   |
|        | ***** * ***** *                                                      |      |
| KIFC1  | GGCTCCTGGA-----CAGCCTGGCTTCGGCGTTTTGCGGCGCGAGCCCTTGAGAG              | 82   |
| KIFC5B | GGCCGATTGGCCTGGCGAATTGGCCTGGCTCCGACGTTTTGCGGCGCGAGCCCTTGAGAG         | 120  |
|        | *** * * ***** ** *****                                               |      |
| KIFC1  | GACGCGGGTCTCATCGTCCTGCCTGCTGCCTTTGCACC-CTTTCTGTGCGGACCACCATG         | 141  |
| KIFC5B | GACGCGGGTCTCGTCACCCTGCCTGCTGCCTTTGCATCCCTTCCTGTGCGGACCACCATG         | 180  |
|        | ***** ** ***** * *** *****                                           |      |
| KIFC1  | GACGTGCAGGCGCAGAGGCCACCTTTGTTGGAAGTGAAGAGGAACGTAGAACTGAAGGCA         | 201  |
| KIFC5B | GACGTGCAGGCGCAGAGAAAG---GGAAGGGAAGGGAAGAGGAACGTAGAACTGAAGGCG         | 237  |
|        | ***** *****                                                          |      |
| KIFC1  | CCCCTGGTGAAGTCCTCCTCCCGAGTGCCCTGTGTCAGCAAGCAGGCTCAAGAGGGGTCTT        | 261  |
| KIFC5B | CCCCTGGTCAAGTCCTCCTCCCGACTGCCCTGTGTCAGCAAGCAGCCTCAAGAGGGGTCTT        | 297  |
|        | ***** *****                                                          |      |
| KIFC1  | GACCAGATGGAGGATGCCTTGGAGCCTGCAAAGAAACGGACACGAGTCATGGGTGCAGTG         | 321  |
| KIFC5B | GACCAGATGGAGGATGCCTTGGAGCCTGCAAAGAAACGGACACGAGTCATGGGTGCAGTG         | 357  |
|        | *****                                                                |      |
| KIFC1  | ACCAAAGTTGACACATCCCGTCCCAGAGGACCACTCCTCAGCACAGTGTACAGACCCAG          | 381  |
| KIFC5B | ACCAAAGTTGACACATCCCGTCCCAGAGGACCACTCCTCAGCACAGTGTACAGACCCAG          | 417  |
|        | *****                                                                |      |
| KIFC1  | GGCCACACTGCAGCTCAGAAAGGCCCTAAGAAGACAGGACCTCGTGGGTGCTCTGCTATT         | 441  |
| KIFC5B | GGCCACAATGCAGCTCAGAAAGGCCCTAAGAAGACAGGACCTGGTGGGTGCTCTGCTGTT         | 477  |
|        | ***** *****                                                          |      |
| KIFC1  | GGTACAGTGTGAGGAGCCAGAAGCCAGTTCCCGCTGCTCCTGCCCAGAAGCCTGGCACA          | 501  |
| KIFC5B | GGTACAGTGTGAGGAGCCAGAAGCCAGTTCCCGCTGCTCCTGC--GAAGCCTGGCACA           | 534  |
|        | *****                                                                |      |
| KIFC1  | TCCACTGCTCCTGTGGTGGTAGGGAAGAGAGCTGGCAAACGCCCTGCCTGGGACCTGAAG         | 561  |
| KIFC5B | TCCACTGCTCCTGTGGTGGTAGGGAAGAGAGCTGGCAAACGCCCTGCCTGGGACCTGAAG         | 594  |
|        | *****                                                                |      |
| KIFC1  | GGCCAGTTGTGTGACCTCAATGAAGAGTTGAAACGCTATCGGGAGAAGACTCAAACGCTG         | 621  |
| KIFC5B | GGCCAGTTGTGTGACCTCAATGAAGAGTTGAAACGCTATCGGGAGAAGACTGAAACGCTG         | 654  |
|        | *****                                                                |      |
| KIFC1  | GAAGTGGAGAACCGGGGTCTTCGGGAGCAACTCAGAGAGGTCCAGGAGCAGGCCACGACC         | 681  |
| KIFC5B | GAAGTGGAGAACCGGGGTCTTCGGGAGCAACTCAGAGAGGTCCAGGAGCAGGCCACGACC         | 714  |
|        | *****                                                                |      |
| KIFC1  | CTGGGGACAGAGCGGAACACCCTGGAAGGGGAGCTGGCCAGTGTACGCAGCCGAGCTGAG         | 741  |
| KIFC5B | CTGGGGACAGAGCGGAACACCCTGGAAGGGGAGCTGGCCAGTGTACGCAGCCGAGCTGAG         | 774  |
|        | *****                                                                |      |
| KIFC1  | CAGGACCAGCAGAGGCTGGAGACGCTGAGTGCCCGTGTCTTGAGCTGGAGGAATGTCTG          | 801  |
| KIFC5B | CAGGACCAGCAGAGGCTGGAGACGCTGAGTGCCCGTGTCTTGAGCTGGAGGAATGTCTG          | 834  |
|        | *****                                                                |      |
| KIFC1  | GGTACCAGGGAAGGCTGCTTCAGGAGCTTCAGGGAGAGCGGCTGCAATTGCAGGAGGAG          | 861  |
| KIFC5B | GGTACCAGGGAAGGCTGCTTCAGGAGCTTCAGGGAGAGCGGCTGCAATTGCAGGAGGAG          | 894  |
|        | *****                                                                |      |
| KIFC1  | CGGAGCACACTGAGCACCCAGCTGGAGGAGCAGGAGAGGAGTTTCAGGCCACAGAAGCA          | 921  |
| KIFC5B | CGGAGCACACTGAGCACCCAAGCTGGAGGAGCAGGAGAGGAGTTTCAGGCCACAGAAGCA         | 954  |
|        | *****                                                                |      |
| KIFC1  | GCTCTGTCAAGCAGCCAAGAAGAGGTGGTGTGTCTTCGGCAGAAGACTGAAGCCCAGGTG         | 981  |
| KIFC5B | GCTCTGTCAAGCAGCCAAGAAGAGGTGGTGTGTCTTCGGCAGAAGACTGAAGCCCAGGTG         | 1014 |
|        | *****                                                                |      |
| KIFC1  | ACCTTACTGGCTGAGCAAGGAGACCGGCTCTATGGGTTAGAGATGGAGCGGCGA <b>CGACTC</b> | 1041 |
| KIFC5B | ACCTTACTGGCTGAGCAAGGAGACCGGCTCTATGGGTTAGAGATGGAGCGGCGG <b>CGACTC</b> | 1074 |

**Supplementary Figure S2 (Part 1). mRNA sequence alignment of Kifc1 and Kifc5b.** Location of siRNA targeting sites, 5' and 3' untranslated regions are as marked.

# RNA9867

|        |                                                               |                                                 |      |         |
|--------|---------------------------------------------------------------|-------------------------------------------------|------|---------|
| KIFC1  | CACAACCAGCTGCA                                                | AGGAACTGAAGGGCAATATCCGGGTGTTCTGCCGCGTGCGCCCTGTC | 1101 |         |
| KIFC5B | CACAACCAGCTGCA                                                | AGGAACTGAAGGGCAATATCCGGGTGTTCTGCCGCGTGCGCCCTGTC | 1134 |         |
|        | *****                                                         |                                                 |      |         |
| KIFC1  | CTCGAAGGGGAATCCACTCCATCTCCTGGCTTCCTCGTGTTCCTCCTGGCCCTGCTGGA   | 1161                                            |      |         |
| KIFC5B | CTCGAAGGGGAATCCACTCCATCTCCTGGCTTCCTCGTGTTCCTCCTGGCCCTGCTGGA   | 1194                                            |      |         |
|        | *****                                                         |                                                 |      |         |
| KIFC1  | CCCTCTGATCCCCGACGGGCCTTAGCCTCTCACGATCTGATGATCGGCGCTCCACCCTG   | 1221                                            |      |         |
| KIFC5B | CCCTCTGATCGCCGACGGGCCTTAGCCTCTCACGATCTGATGATCGGCGCTCCACCCTG   | 1254                                            |      |         |
|        | *****                                                         |                                                 |      |         |
| KIFC1  | ACTGGGGCCCCGGCCCCACTGTCCGCCATGATTTCTCCTTTGATCGGGTGTTCCCGCCG   | 1281                                            |      |         |
| KIFC5B | ACTGGGGCCCCGGCACCCACTGTCCGCCATGATTTCTCCTTTGATCGGGTGTTCCCGCCG  | 1314                                            |      |         |
|        | *****                                                         |                                                 |      |         |
| KIFC1  | GGAAGCAAGCAGGAGGAAGTGTGAGGAGATCGCCATGCTTGTCAGTCAGCACTGGAT     | 1341                                            |      |         |
| KIFC5B | GGAAGCAAGCAGGAGGAAGTGTGAGGAGATCGCCATGCTTGTCAGTCAGCACTAGAT     | 1374                                            |      |         |
|        | *****                                                         |                                                 |      |         |
| KIFC1  | GGCTACCTGTGTGCATTTTGCCTATGGACAGACAGGCAGTGGCAAGACCTTCACTATG    | 1401                                            |      |         |
| KIFC5B | GGCTACCTGTGTGCATTTTGCCTATGGACAGACAGGCAGTGGCAAGACCTTCACTATG    | 1434                                            |      |         |
|        | *****                                                         |                                                 |      |         |
| KIFC1  | GAAGGAGGGCCTAGGGGAGACCCCCAATTGGAAGGGCTGATCCCTCGGGCCATGCGGCAT  | 1461                                            |      |         |
| KIFC5B | GAAGGAGGGCCTAGGGGAGACCCCCAATTGGCAGGGCTGATCCCTCGGGCCATGCGGCAT  | 1494                                            |      |         |
|        | *****                                                         |                                                 |      |         |
| KIFC1  | CTGTTCTCTGTGGCCCAGGAGATGAGCGGCCAGGGCTGGACATACAGTTTGTGGCGAGT   | 1521                                            |      |         |
| KIFC5B | CTGTTCTCTGTGGCCCAGGAGATGAGCGGCCAGGGCTGGACATACAGTTTGTGGCGAGT   | 1554                                            |      |         |
|        | *****                                                         |                                                 |      |         |
| KIFC1  | TACGTAGAGATCTACAATGAGACCGTTCGAGACCTGCTAGCTACTGGGCCCCGCAAGGGA  | 1581                                            |      | RNA9878 |
| KIFC5B | TACGTAGAGATCTACAATGAGACCGTTCGAGACCTGCTAGCTACTGGGCCCCGCAAGGGA  | 1614                                            |      | RNA9879 |
|        | *****                                                         |                                                 |      |         |
| KIFC1  | CAAGGGGGCGAGTGTGAGATCCGTCGGGCAAGCCCAGGAAGTGAGGAGCTTACTGTACC   | 1641                                            |      |         |
| KIFC5B | CAAGGGGGCGAGTGTGAGATCCGTCGGGCAAGCCCAGGGAGTGAGGAGCTTACTGTACC   | 1674                                            |      |         |
|        | *****                                                         |                                                 |      |         |
| KIFC1  | AATGCCCGCTATGTCCCTGTTTCCTGTGAGAAAGAGGTGGAGGCCCTGCTCCATTTGGCT  | 1701                                            |      |         |
| KIFC5B | AATGCCCGCTATGTCCCTGTTTCCTGTGAGAAAGAGGTGGAGGCCCTGCTCCATTTGGCT  | 1734                                            |      |         |
|        | *****                                                         |                                                 |      |         |
| KIFC1  | CATCAGAACC GGCTGTGGCCACACTGCCCAAATAAGAGATCATCACGCAGTCATAGT    | 1761                                            |      |         |
| KIFC5B | CACCAGAACC GGCTGTGGCCACACTGCCCAATAAGAGATCATCACGCAGTCATAGT     | 1794                                            |      |         |
|        | ** *****                                                      |                                                 |      |         |
| KIFC1  | GTGTTCCAGCTGCAGATTTCTGGAGAGCATGCAGCTCGGGCCTGCAGTGTGGCGCTCCG   | 1821                                            |      |         |
| KIFC5B | GTGTTCCAGCTGCAGATTTCTGGAGAGCATGCAGCCGGGGCCTGCAGTGTGGCGCTCCC   | 1854                                            |      |         |
|        | *****                                                         |                                                 |      |         |
| KIFC1  | CTCAACCTTGTGGACCTAGCTGGGAGTGAGCGGCTAGACCCTGGCTTACACCTAGGCCCT  | 1881                                            |      |         |
| KIFC5B | CTCAACCTTGTGGACCTAGCTGGGAGTGAGCGGCTAGACCCTGGCTTACCCCTAGGCCCT  | 1914                                            |      |         |
|        | *****                                                         |                                                 |      |         |
| KIFC1  | GGGGAGCGTGATCGTCTTCGGGAGACACAGGCCATTAACAGCAGTCTGTCTACACTGGGA  | 1941                                            |      |         |
| KIFC5B | GGGGAGCGTGATCGTCTTCGGGAGACACAGGCCATTAACAGCAGTCTGTCTACATTGGGA  | 1974                                            |      |         |
|        | *****                                                         |                                                 |      |         |
| KIFC1  | CTGGTCATAATGGCCCTGAGCAATAAGGAGTCCACGTGCCTTACCGAAACAGCAAGCTC   | 2001                                            |      |         |
| KIFC5B | CTGGTCATAATGGCCCTGAGCAATAAGGAGTCCACGTGCCTTACCGAAACAGCAAGCTC   | 2034                                            |      |         |
|        | *****                                                         |                                                 |      |         |
| KIFC1  | ACCTACTTGTCTGCAGAACTCTCTGGGTGGCAGTGCCAAGATGCTTATGTTTGTGAATATT | 2061                                            |      |         |
| KIFC5B | ACCTACTTGTCTGCAGAACTCTCTGGGTGGCAGTGCCAAGATGCTTATGTTTGTGAATATT | 2094                                            |      |         |
|        | *****                                                         |                                                 |      |         |
| KIFC1  | TCTCCTCTGGAAGAGAATGTCTCCGAGTCTCTGAATTCACTACGCTTTGCTTCCAAGGTG  | 2121                                            |      |         |
| KIFC5B | TCTCCTCTGGAAGAGAATGTCTCCGAGTCTCTGAATTCACTACGCTTTGCTTCCAAGGTG  | 2154                                            |      |         |
|        | *****                                                         |                                                 |      |         |

**Supplementary Figure S2 (Part 2). mRNA sequence alignment of Kifc1 and Kifc5b.** Location of siRNA targeting sites, 5' and 3' untranslated regions are as marked.

```

KIFC1  AACCAGTGTGTCATTGGTACTGCTCAGGCTAATAAGAAGTGAAGTCGGATCCAGAGCCTG 2181
KIFC5B AACCAGTGTGTCATTGGTACTGCTCAGGCTAATAAGAAGTGAAGTCGGATCCAGAGC--- 2211
      *****

KIFC1  ATTCCTTGCAAGCCAGTGCGCATGCGTCTCTGTTTTAGTGTGTA----TTCGGTGGGGG 2237
KIFC5B ----CCTTGCAAGCCAGTGCGCATGCGTCTCTGTTTTAGTGTGTATTTATTCGGTGGGGG 2267
      *****

KIFC1  TGGGTGGGAGTTGAGACATGATTTTATTGGGTGAACAATATTTATTATGTAATCAACTAT 2297
KIFC5B TGGGTGGGAGTTGAGACATGATATTACTGGG-----TATTTATTATGTAATAAAGAAT 2320
      *****

KIFC1  AAAT----AAAGAATAATCTGTTGGTTAAAA-----AAAAA----- 2330
KIFC5B AATCTTTTGTATGTTAATCCTTTTCTTAATCTTAGATTTTAAAAAATTGTGTGCAGTTGT 2380
      **          *      ***** **      *****

KIFC1  ----- 2330
KIFC5B TTTGCCTGAGTGTATATGCATGCACCATGTGCATGTCTCCTGCTCCAGTGAGTTCAGAAC 2440

KIFC1  ----- 2330
KIFC5B AGGGCTTCAGGTCCTTCAAGAACTGGGATTATGGAATACATGTGGGTCCTCTGCAAAATC 2500

KIFC1  ----- 2330
KIFC5B AGTCAGTGCTCTTAACCGCCCAGCCATCTTCCCAGCCCGGCCCTTGTTACAGCTCTAAAC 2560

KIFC1  ----- 2330
KIFC5B GGTTTTATTAACCTTAACGGTTTTAGCTGCCAAAGGAAGGTATTGTAAATAAATACTGTAA 2620

KIFC1  ----- 2330
KIFC5B GCACGTA 2627

```

3' UTR

**Supplementary Figure S2 (Part 3). mRNA sequence alignment of Kifc1 and Kifc5b.** Location of siRNA targeting sites, 5' and 3' untranslated regions are as marked.

```

KIFC1 MDVQAQRPPLEVKRNVELKAALVKSSSRVPLSASRLKRGPDQMEDALEPAKKRTRVMGA 60
KIFC5B MDVQAQRKG-REGKRNVELKAALVKSSSRPLSASSLKRGPDPQMEDALEPAKKRTRVMGA 59
***** * *****:***** *****
KIFC1 VTKVDTSRPRGPLLSTVSQTQGHTAAQKGPKKTGPRGCSAIGTVLRSQKPVAAPAQKPG 120
KIFC5B VTKVDTSRPRGPLLSTVSQTQGHNAAQKGPKKTGPGGCSAVGTVLRSQKPAPAAPA-KPG 118
*****.***** *****:*****.***** ***
KIFC1 TSTAPVVVGKRAGKRPAPDLKGQLCDLNEELKRYREKTQTLELENRGLREQLREVQEAT 180
KIFC5B TSTAPVVVGKRAGKRPAPDLKGQLCDLNEELKRYREKTETLELENRGLREQLREVQEAT 178
*****:*****
KIFC1 TLGTERNTLEGELASVRSRAEQDQQRLETLSARVLELEECLGTRELLQELQGERLQLQE 240
KIFC5B TLGTERNTLEGELASVRSRAEQDQQRLETLSARVLELEECLGTRELLQELQGERLQLQE 238
*****
KIFC1 ERSTLSTQLEEQERRFQATEAALSSSQEEVCLRQKTEAQVTLLAEQGDRLYGLEMERRR 300
KIFC5B ERSTLSTQLEEQERRFQATEAALSSSQEEVCLRQKTEAQVTLLAEQGDRLYGLEMERRR 298
*****
KIFC1 LHNQLQELKGNIRVFCRVRPVLEGESTPSPGFLVFPPGPAGPSDPPTGLSLSRSDRRST 360
KIFC5B LHNQLQELKGNIRVFCRVRPVLEGESTPSPGFLVFPPGPAGPSDRPTGLSLSRSDRRST 358
*****
KIFC1 LTGAPAPTVRHDFSFDVFPFGSKQEEVFEEIAMLVQSALDGYPVCIFAYGQTGSGKTFT 420
KIFC5B LTGAPAPTVRHDFSFDVFPFGSKQEEVFEEIAMLVQSALDGYPVCIFAYGQTGSGKTFT 418
*****
KIFC1 MEGGPRGDPQLEGLIPRAMRHLSVAQEMSGQGWTYSFVASYVEIYNETVRDLLATGPRK 480
KIFC5B MEGGPRGDPQLAGLIPRAMRHLSVAQEMSGQGWTYSFVASYVEIYNETVRDLLATGPRK 478
*****
KIFC1 GQGGECEIRRASPGSEELTVTNARYVPVSCEKEVEALLHLAHQNRAVAHTAQNKRSSRSH 540
KIFC5B GQGGECEIRRASPGSEELTVTNARYVPVSCEKEVEALLHLAHQNRAVAHTAQNKRSSRSH 538
*****
KIFC1 SVFQLQISGEHAARGLQCGAPLNLVDLAGSERLDPGLHLGPGERDRLRETQAINSSLSTL 600
KIFC5B SVFQLQISGEHAARGLQCGAPLNLVDLAGSERLDPGLPLGPGERDRLRETQAINSSLSTL 598
*****
KIFC1 GLVIMALSNKESHVPYRNSKLTLYLLQNSLGGSAKMLMFVNISPLEENVSESLNSLRFASK 660
KIFC5B GLVIMALSNKESHVPYRNSKLTLYLLQNSLGGSAKMLMFVNISPLEENVSESLNSLRFASK 658
*****
KIFC1 VNQCVIGTAQANKK 674
KIFC5B VNQCVIGTAQANKK 672
*****

```

**Supplementary Figure S3. Protein sequence alignment of Kifc1 and Kif5b.**

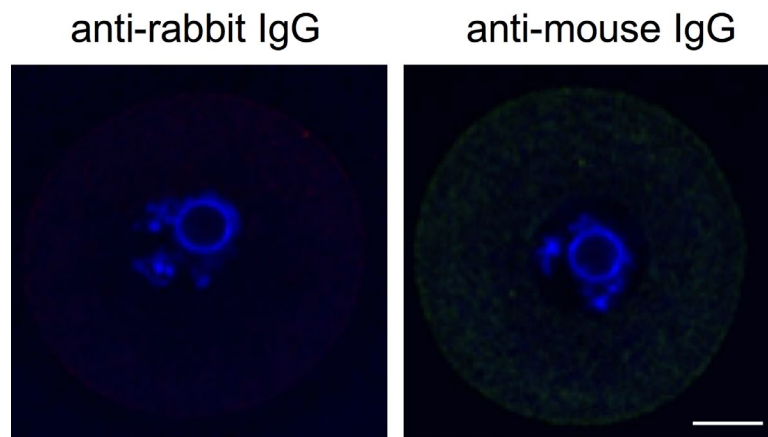

**Supplementary Figure S4. Antibody specificity.** Primary antibodies were substituted with the appropriate concentration of either anti-rabbit (red) or anti-mouse (green) IgG in negative control groups for immunocytochemistry. Oocytes were counterstained with the nuclear stain Hoechst 33342 (blue) and viewed using confocal microscopy. Scale bar = 20  $\mu$ m.

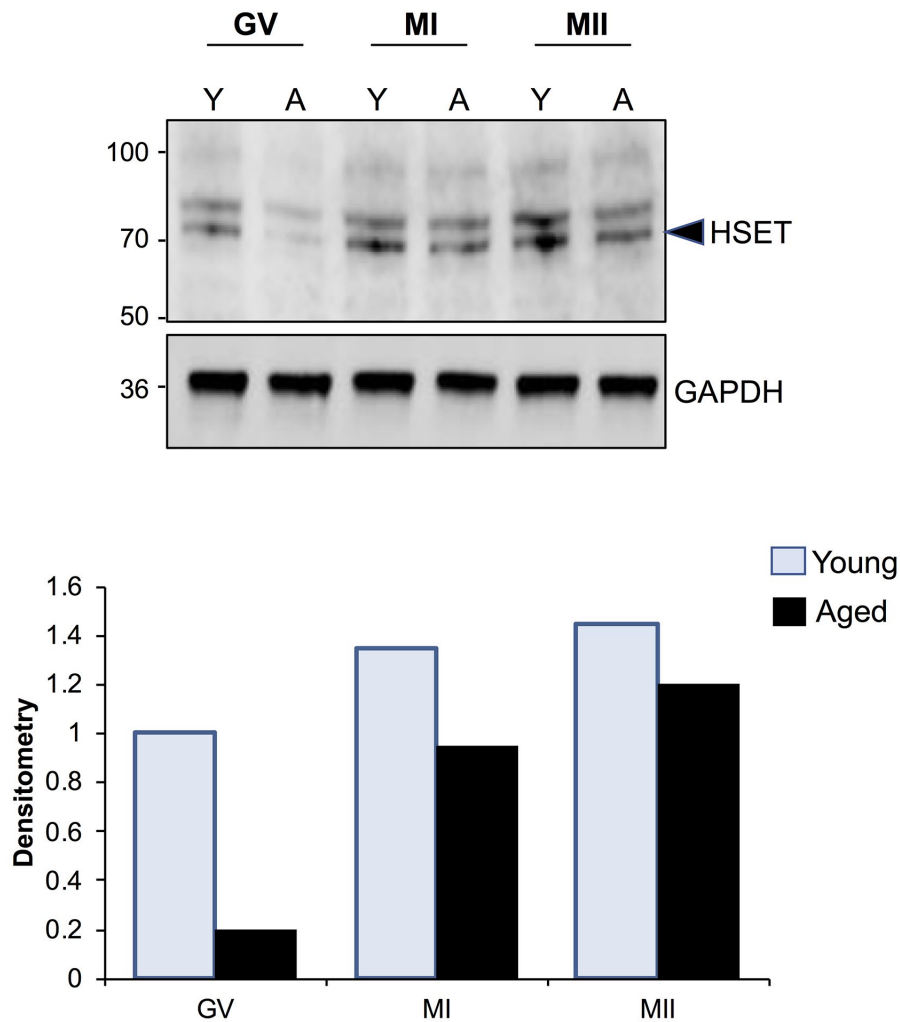

**Supplementary Figure S5. Anti-HSET immunoblot in young and aged oocytes.** Immunoblotting with anti-HSET antibodies revealed a predominant band at the appropriate molecular weight of approximately 74 kDa in cell lysates prepared from isolated GV, MI and MII stage oocytes of young (Y) and aged (A) animals. Densitometric analysis of the labeling intensity of the HSET band relative to that of the GAPDH loading control, revealed an age-dependent decrease in the relative abundance of HSET in lysates of aged GV, MI and, to a lesser extent, MII stage oocytes. This experiment was repeated once with each lane being loaded with total protein lysates prepared from the equivalent of 100 oocytes (i.e. ~ 2  $\mu$ g protein / lane).
